# Supplementary material for: Membrane Permeabilization and Antimicrobial Activity of Recombinant Defensin-d2 and Actifensin against Multidrug-Resistant Pseudomonas aeruginosa and Candida albicans
Source: MDPI journal article supplement (doi:10.3390/molecules27144325), 2022-07-06
Supplement: s1 [file s1]

## Supplementary data

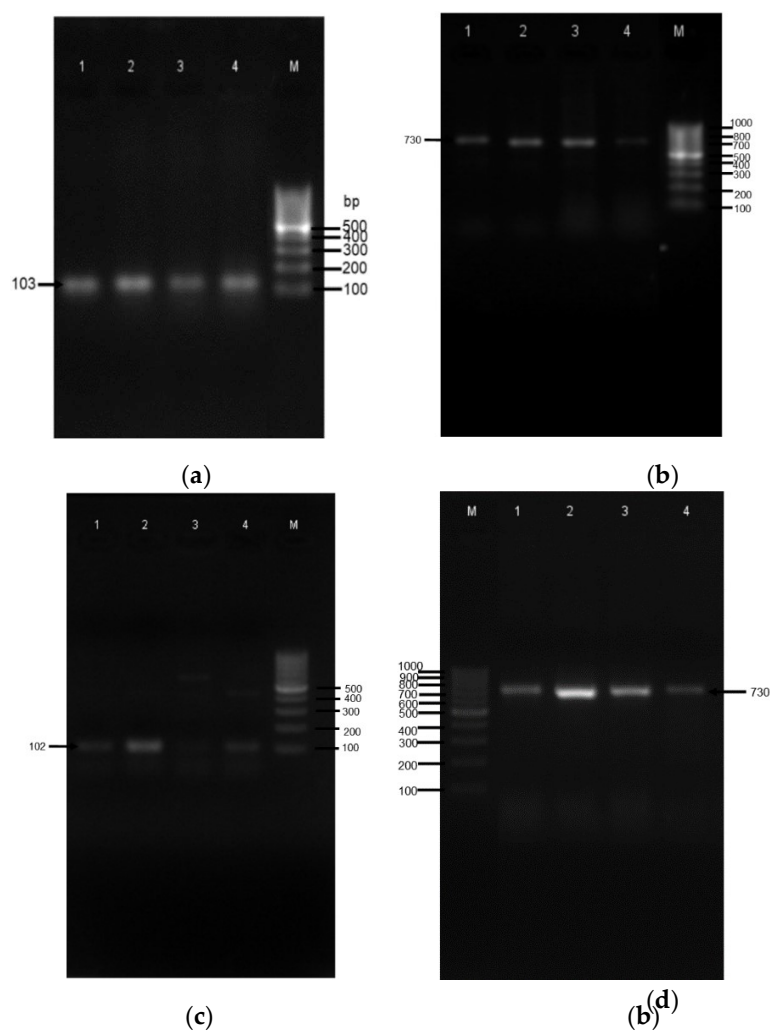

**Figure S1.** Gel electrophoresis of colony PCR amplification of gene and plasmid fragments.

(a) colonies positive for actifensin gene, L1 – 4, M-100 bp ladder; (b) actifensin-positive clones showing the presence of pTXB1, L1 – 4, M-100 bp ladder; (c) colonies positive for defensin-d2 gene, L1 – 4, M-100 bp ladder; (d) actifensin-positive clones showing the presence of pTXB1, L1 – 4, M-100 bp ladder.

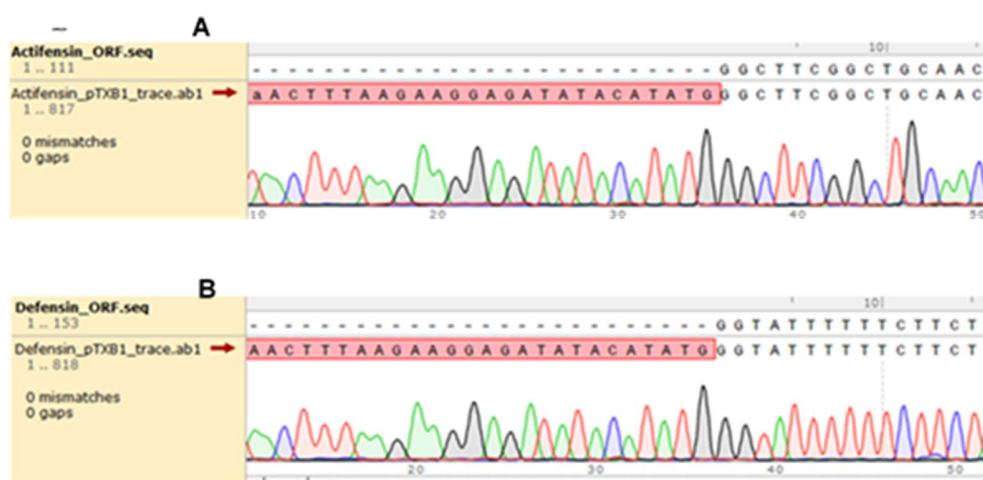

**Figure S2.** Alignment of actifensin ORF (A) and defensin-d2 ORF (B) with respective sequences of recombinant pTXB1 after plasmid sequencing. The alignment shows an in-frame insertion of both target genes at the start codon (ATG)

**Table S1.** Peptide-ligand affinity scores of defensin-d2 and actifensin

| Defensin-d2     |          |                  | Actifensin      |          |                  |
|-----------------|----------|------------------|-----------------|----------|------------------|
| Ligand symbol   | Residues | Propensity score | Ligand symbol   | Residues | Propensity score |
| ACT             | F        | 5                | ACT             | F        | 5                |
|                 | R        | 8                |                 | R        | 8                |
|                 | Y        | 6                |                 | Y        | 6                |
|                 |          |                  |                 | H        | 9                |
| PO <sub>4</sub> | R        | 8                | PO <sub>4</sub> | R        | 8                |
|                 |          |                  |                 | H        | 9                |
| EDO             | F        | 6                | EDO             | F        | 6                |
|                 | R        | 7                |                 | R        | 7                |
|                 | K        | 4                |                 | K        | 4                |
|                 | N        | 5                |                 | N        | 5                |
|                 | Y        | 9                |                 | Y        | 9                |
|                 |          |                  |                 | H        | 5                |
| PA8             | -        | -                | PA8             | -        | -                |
| PGE             | R        | 5                | PGE             | R        | 5                |
|                 | Y        | 6                |                 | Y        | 6                |
| MRD             | F        | 6                | MRD             | F        | 6                |
|                 | R        | 5                |                 | R        | 5                |
|                 | Y        | 8                |                 | Y        | 8                |
|                 | M        | 5                |                 |          |                  |
| P10             | R        | 5                | P10             | R        | 5                |
|                 | I        | 4                |                 | I        | 4                |
|                 |          |                  |                 | K        | 9                |
|                 | K        | 9                |                 | H        | 6                |
| 44E             | -        | -                | 44E             | -        | -                |
| SO <sub>4</sub> | R        | 9                | SO <sub>4</sub> | R        | 9                |

|     |   |   |     |   |   |
|-----|---|---|-----|---|---|
|     | K | 4 |     | K | 4 |
|     |   |   |     | H | 6 |
| GOL | F | 4 | GOL | F | 4 |
|     | R | 6 |     | R | 6 |
|     | N | 4 |     | N | 4 |
|     | D | 4 |     | Y | 6 |
|     |   |   |     | Q | 4 |
|     |   |   |     | H | 6 |
| CL  | R | 9 | CL  | R | 9 |
|     | K | 5 |     | K | 5 |
|     | N | 5 |     | N | 5 |
|     |   |   |     | H | 9 |
| FLC | R | 8 | FLC | R | 8 |
|     | K | 4 |     | K | 4 |
|     |   |   |     | H | 9 |
| PEG | R | 5 | PEG | R | 5 |
|     | Y | 6 |     | Y | 6 |
|     |   |   |     | H | 5 |
| 13C | R | 6 | 13C | R | 6 |
|     | Y | 5 |     | Y | 5 |
|     |   |   |     | N | 4 |
|     |   |   |     | H | 9 |
